# Supplementary material for: In quest for chemomarkers to classify Taiwanese teas
Source: Royal Society of Chemistry journal article supplement (doi:10.1039/c3ay42009d), 2014-01-01
Supplement: c3ay42009d1.xlsx [file c3ay42009d1.xlsx]

## Sheet: List of samples
No	Country of manufacture	Kind	Details
1	Taiwan	green
2	Taiwan	oolong
3	Taiwan	oolong
4	Taiwan	oolong
5	Taiwan	oolong
6	Taiwan	oolong
7	Taiwan	oolong
8	Taiwan	oolong
9	Taiwan	oolong
10	Taiwan	oolong
11	Taiwan	oolong
12	Taiwan	oolong
13	Taiwan	oolong
14	Taiwan	oolong
15	Taiwan	black
16	Sri Lanka	black
17	South Korea	red
18	Taiwan	oolong
19	England	black
20	Sri Lanka	black
21	Taiwan	red
22	Taiwan	oolong	flavored
23	Taiwan	green	flavored
24	Taiwan	other	flavored
25	Taiwan	other	flavored
26	Korea	green	flavored
27	Sri Lanka	green
28	Sri Lanka	black
29	Taiwan	oolong
30	Sri Lanka	black
31	Japan	green
32	Taiwan	black	flavored
33	Taiwan	oolong
34	Taiwan	oolong
35	Taiwan	green
36	USA	black	flavored
37	Sri Lanka	green	flavored
38	Indonesia	black
39	Taiwan	oolong
40	Taiwan	oolong
41	Taiwan	black
42	Taiwan	oolong
43	Taiwan	green
44	Sri Lanka	black
45	Taiwan	oolong
46	Taiwan	oolong
47	Taiwan	oolong
48	Taiwan	oolong
49	Taiwan	oolong
50	Taiwan	oolong
51	Taiwan	oolong
52	Taiwan	oolong
53	Taiwan	oolong
54	Taiwan	oolong
55	Taiwan	green
56	Taiwan	black
57	Taiwan	black
58	Taiwan	green
59	Taiwan	green
60	England	black
61	Taiwan	oolong
62	Taiwan	oolong
63	Taiwan	black
64	England	black
65	England	black
66	England	black
67	England	black
68	Sri Lanka	black
69	Japan	green
70	Taiwan	oolong
71	Hong Kong	other
72	Taiwan	black
73	Taiwan	oolong
74	Taiwan	oolong
75	Taiwan	black
76	Italy	black
77	Czech Republic	other	flavored
78	Japan	other
79	Taiwan	black	flavored
80	Taiwan	black
81	Taiwan	black
82	Singapore	green
83	Taiwan	green	flavored
84	Taiwan	green	flavored
85	Taiwan	green
86	Taiwan	black
87	Taiwan	oolong
88	Taiwan	black
89	Taiwan	green
90	Taiwan	green
91	Taiwan	oolong
92	Taiwan	oolong
93	Taiwan	oolong
94	China	red
95	China	red
96	Taiwan	green
97	Taiwan	oolong
98	Taiwan	green	flavored
99	Taiwan	oolong
100	Taiwan	oolong
101	Taiwan	oolong
102	Taiwan	oolong
103	Taiwan	oolong
104	Taiwan	oolong
105	Taiwan	green
106	Taiwan	green
